# Supplementary material for: Molybdenum(vi) cis-dioxo complexes bearing sugar derived chiral Schiff-base ligands: synthesis, characterization, and catalytic applications
Source: Royal Society of Chemistry journal article supplement (doi:10.1039/b306039j), 2003-01-01
Supplement: b306039j.doc [file b306039j.doc]

**Analytical and spectroscopic data for ligand 1**

*N*-salicylidene-D-glucosamine (**1**):

Yield 80%. Anal. Calcd. For C13H17NO6 (283.28): C 55.12; H 6.05; N 4.94. Found C 55.43; H 6.18; N 4.69. IR: 3385 br vs (OH), 1623vs (C=N), 1515s, 1485s, 1400s, 1146s, 1092vs, 1039vs, 1008vs, 892s, 762vs, 592s; 1H NMR (CD3OD,  ppm) = 13.91 (1H, s, -Ar-OH) 13.20 (2H, s, ß-Ar-OH), 8.32 (1H, s, -CH=N), 8.31 (2H, s, ß-CH=N), 7.28-6.64 (4H, m, -Ar-H), 7.22-6.75 (8H, m, ß-Ar-H), 5.09 (1H, d, *J*1,2 3.52 Hz, -H-1), 4.74 (2H, d, *J*1,2 7.80 Hz, ß-H-1), 3.82- 2.85 (18H, m, mixture of other - and ß-sugar ring Hs).

**Figure Captions:**

**Figure S-1**: ORTEP style drawing of the structure of compound **2**. The thermal ellipsoids are given at a 50 % probability level. Selected bond distances (pm) and bond angles (deg): N–C2 145.1(2), N–C15 127.1(2), C17–O10 134.1(2), C1–O2 145.0(2), C3–O4 144.4(2); C2–N–C15 117.37(12), C2–C1–O2 108.29(10), C1–O2–C7 119.31(11), C1–C2–C3 107.48(10).

**Figure S-2**: ORTEP style drawing of the structure of compound **3**. The thermal ellipsoids are given at a 50 % probability level. Selected bond distances (pm) and bond angles (deg): N–C2 145.2(2), N–C15 127.6(2), C20–Cl 174.8(2), C17–O10 134.7(2), C1–O2 143.3(2), C3–O4 144.2(2); C2–N–C15 117.70(12), C2–C1–O2 106.57(11), C1–O2–C7 117.41(11), C1–C2–C3 110.03(11).
