# Supplementary figures and images for: Molybdenum(vi) cis-dioxo complexes bearing sugar derived chiral Schiff-base ligands: synthesis, characterization, and catalytic applications
Source: Royal Society of Chemistry journal article supplement (doi:10.1039/b306039j), 2003-01-01

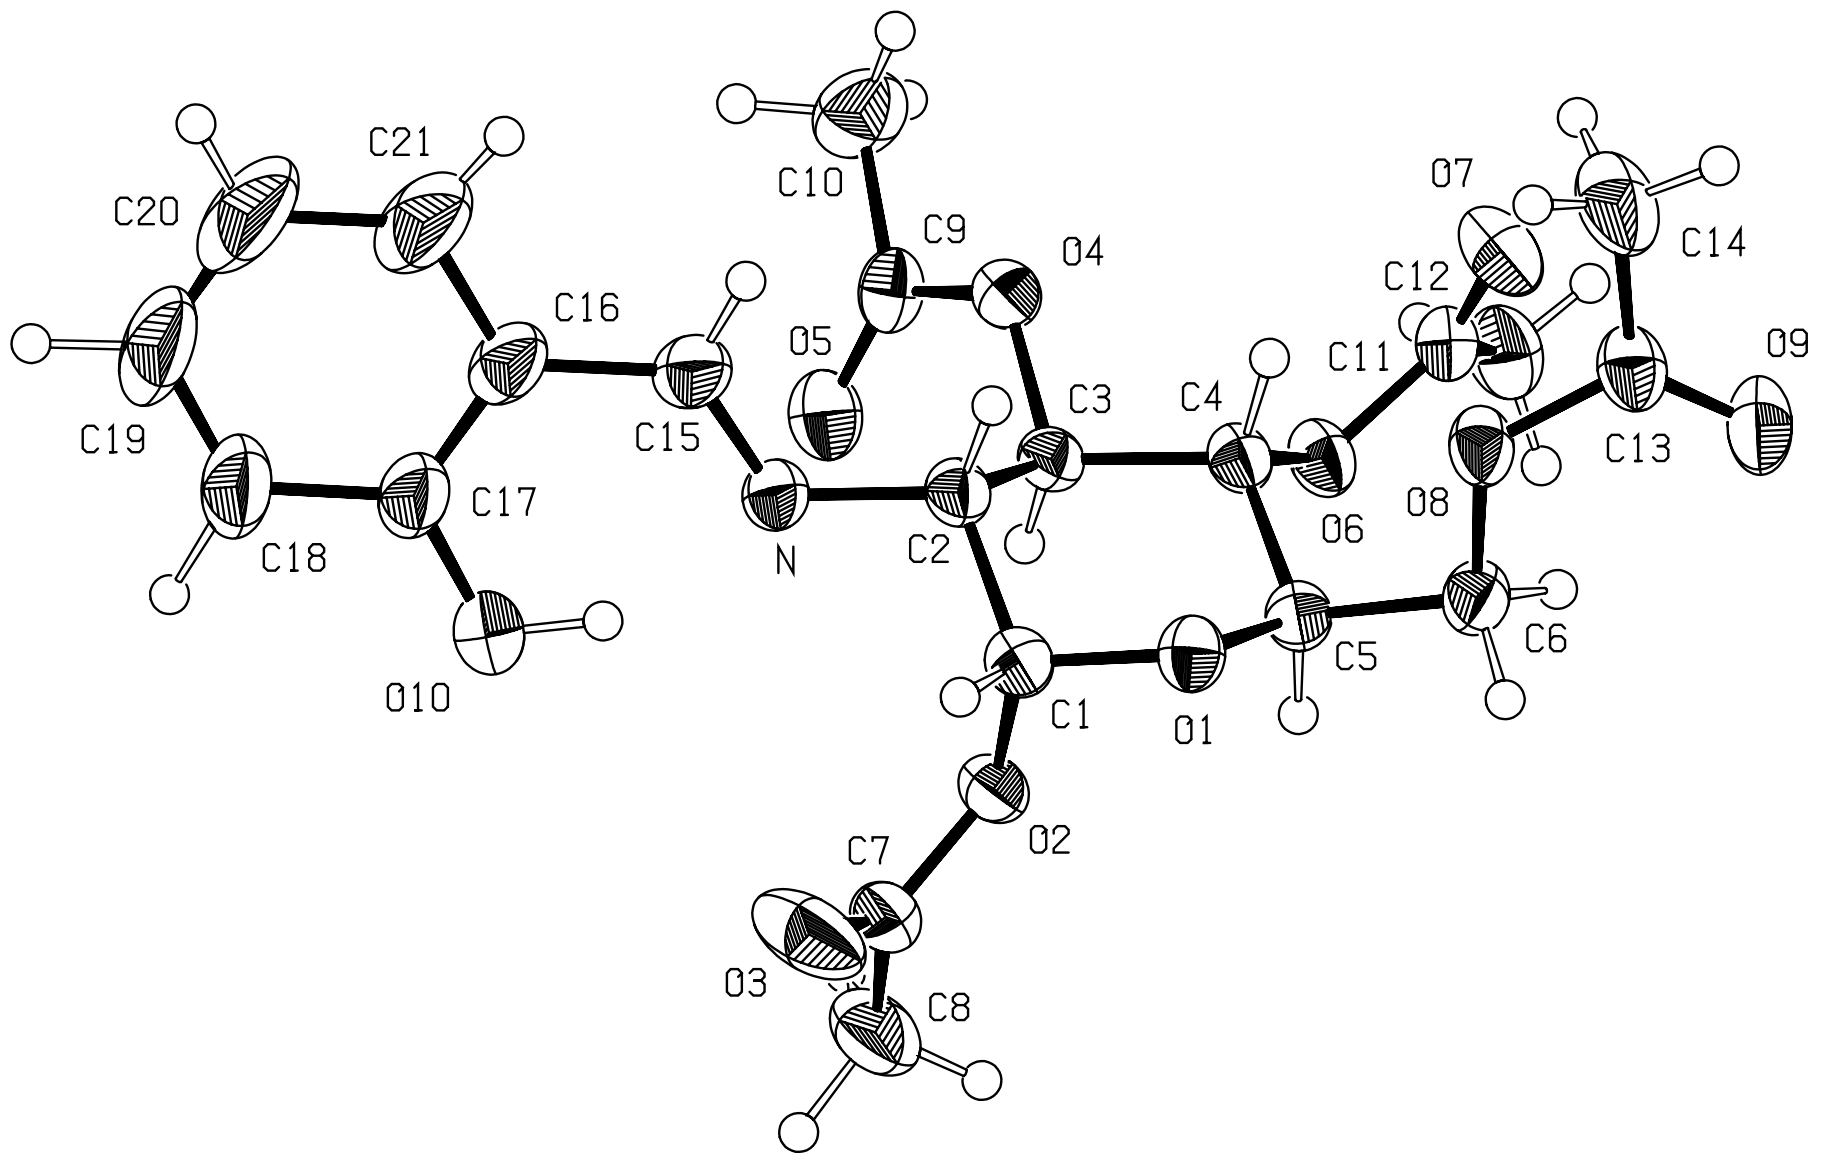

Supplement: b306039j1.pdf [file b306039j1.pdf]

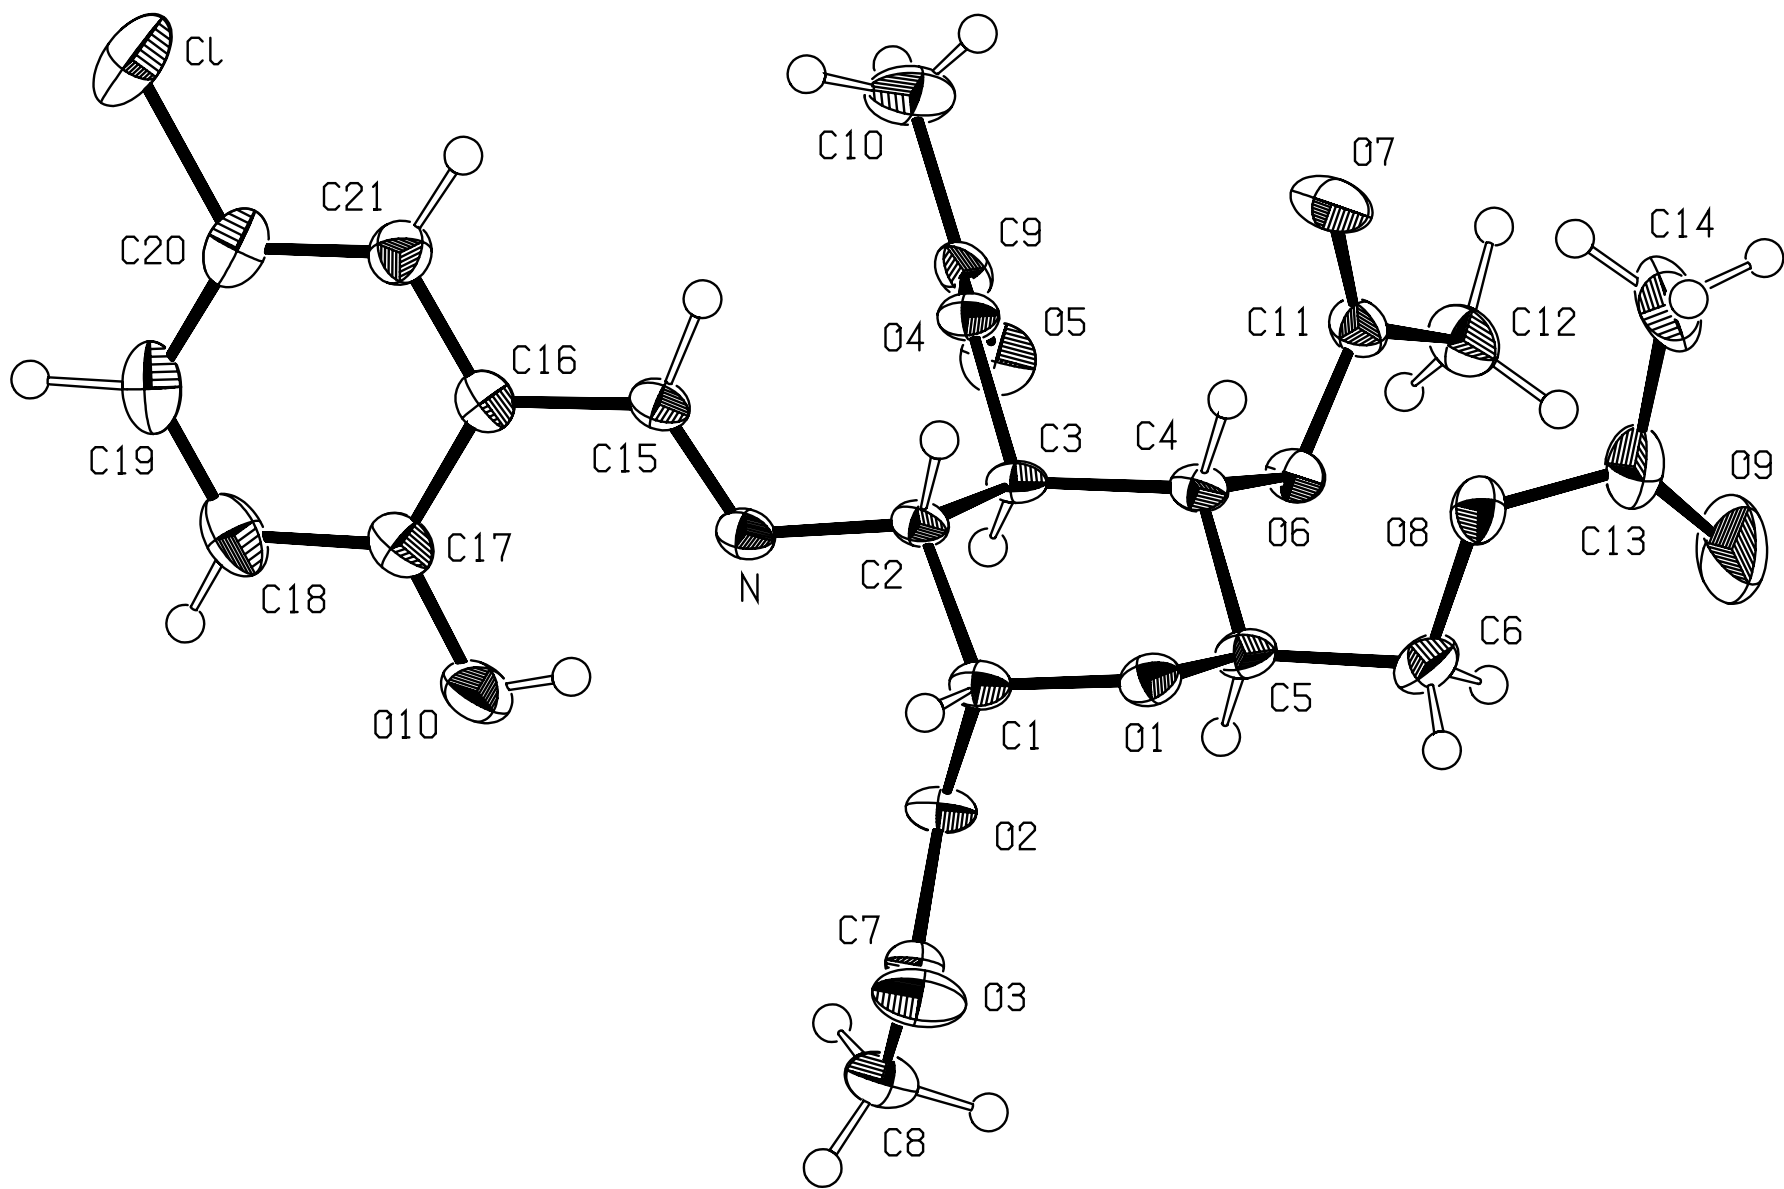

Supplement: b306039j2.pdf [file b306039j2.pdf]
